# Supplementary material for: Alterations in Peripheral Organs following Combined Hypoxemia and Hemorrhagic Shock in a Rat Model of Penetrating Ballistic-Like Brain Injury
Source: PubMed Central journal article supplement (PMC7045350; doi:10.1089/neu.2019.6570), 2020-02-04
Supplement: Supp_Fig1.pdf [file Supp_Fig1.pdf]

## Supplementary Data

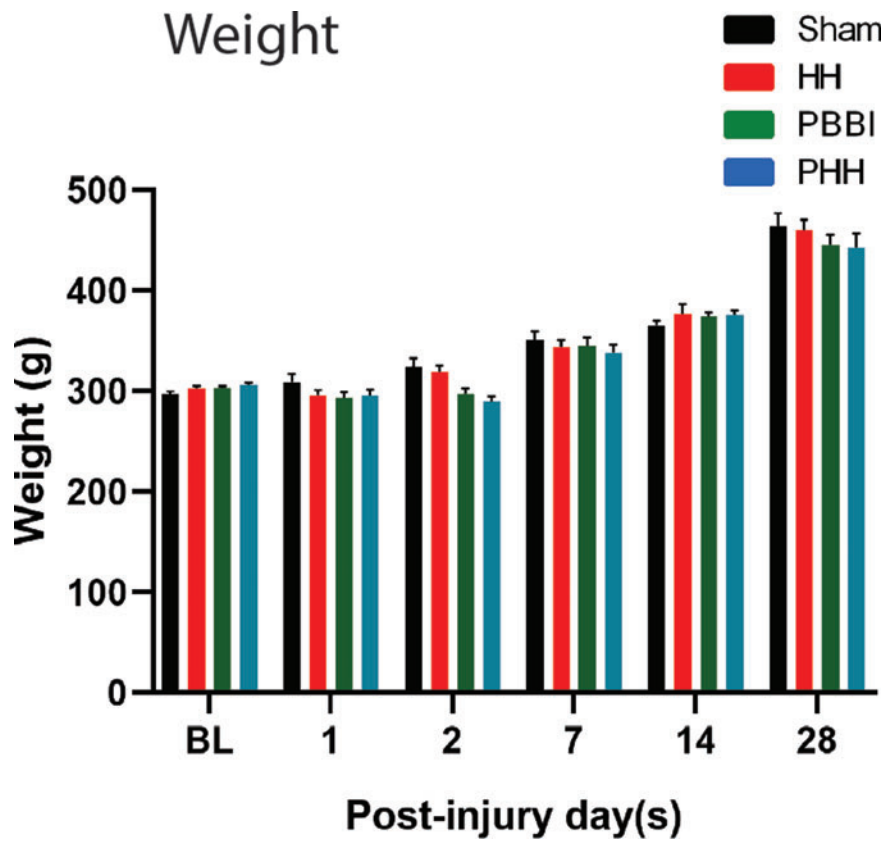

**SUPPLEMENTARY FIG. S1.** Temporal changes in body weight following injury: Body weight measurements for all the rats in the study showing a non-significant reduction in body weight following penetrating ballistic-like brain injury (PBBI) and polytrauma at 2 days post-injury. Baseline (BL) data is from 50 rats (10 rats from each time-point) per group and for the post-injury set it is  $n=10$  per group per time-point; values are presented as mean  $\pm$  standard error of the mean. HH, hypoxemia and hemorrhagic shock (HH); PHH, PBBI followed by hypoxemia and hemorrhagic shock.
